# Supplementary material for: Gestational malaria associated to Plasmodium vivax and Plasmodium falciparum placental mixed-infection followed by foetal loss: a case report from an unstable transmission area in Brazil
Source: Springer Nature journal article supplement (doi:10.1186/1475-2875-10-178), 2011-06-27
Supplement: 12936_2010_1763_MOESM3_ESM.pdf [file 12936_2010_1763_MOESM3_ESM.pdf]

2 DAYS

5 DAYS

2 MONTHS

### Health Center

#### Clinical features

Fever, headache, chills, anorexia, jaundice, hypertension

#### Diagnosis

Blood smear:  
*P. vivax* positive and negative for *P. falciparum*

#### Treatment

Chloroquine

### Maternity

#### Clinical features

Additionally, impairment of intra-uterine growth and FETAL LOSS

#### Diagnosis

Blood Smear: Plasmodial absence  
Nested-PCR placental tissue:  
Positive for *P. falciparum* and *P. vivax*  
Nested-PCR peripheral blood:  
Negative for *P. falciparum* and *P. vivax*

#### Treatment

None

### Home

#### Clinical features

No clear symptom

#### Diagnosis

Blood Smear: negative for *P. falciparum* and *P. vivax*  
Nested-PCR peripheral blood: Positive for *P. falciparum* only

#### Treatment

Artemether  
Lumefantrine

### Patient history

4<sup>th</sup> Malaria Infection, 4<sup>th</sup> Pregnancy, Malaria during the 3<sup>rd</sup> Pregnancy
