# Supplementary figures and images for: Gestational malaria associated to Plasmodium vivax and Plasmodium falciparum placental mixed-infection followed by foetal loss: a case report from an unstable transmission area in Brazil
Source: Springer Nature journal article supplement (doi:10.1186/1475-2875-10-178), 2011-06-27

VIV oligonucleotides

FAL oligonucleotides

MW

B

niB

P

niP

C-

B

niB

P

niP

C-

Pv+

Pf+

200 bp

100 bp

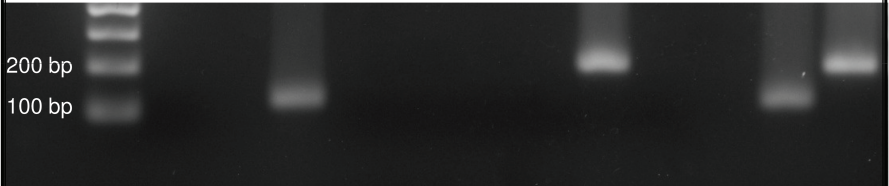

Supplement: 12936_2010_1763_MOESM4_ESM.pdf [file 12936_2010_1763_MOESM4_ESM.pdf]
